# Supplementary material
Source: publisher site journal article supplement (https://www.spandidos-publications.com/1605/downloadSupplementary)
Supplement: Supplementary file 1 [file downloadSupplementary]

Figure S1. Western blot analysis of endometrial LIF protein levels of patients in the mNC and HT+3GnRHa groups on the day of embryo transfer. LIF, leukemia inhibitory factor; mNC, modified natural cycle; HT+3GnRHa, hormone therapy and 3 GnRHa, E2 and P4 treatment cycles.

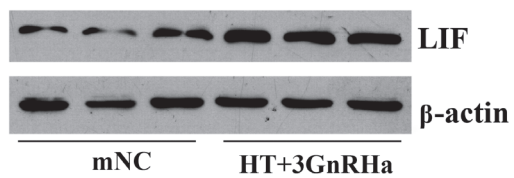

Table SI. Baseline characteristics of patients subjected to endometrial biopsies.

| Characteristic                    | Type of endometrial preparation |            |            |            |            |
|-----------------------------------|---------------------------------|------------|------------|------------|------------|
|                                   | NC                              | HT         | HT+1 GnRHa | HT+2 GnRHa | HT+3 GnRHa |
| Total no. of endometrial biopsies | 15                              | 19         | 17         | 21         | 19         |
| Age, years                        | 30.17±2.31                      | 31.03±2.19 | 30.81±1.97 | 31.27±2.09 | 30.88±2.02 |
| BMI, kg/m <sup>2</sup>            | 22.03±1.57                      | 21.93±1.62 | 21.64±1.43 | 21.09±1.83 | 21.32±1.67 |
| Etiology of infertility, n        |                                 |            |            |            |            |
| Male factor                       | 3                               | 3          | 5          | 4          | 3          |
| Tubal factor                      | 10                              | 15         | 12         | 14         | 16         |
| Other                             | 2                               | 1          | 0          | 3          | 0          |
| Fertility status, n               |                                 |            |            |            |            |
| Primary subfertility              | 11                              | 15         | 11         | 11         | 12         |
| Secondary infertility             | 4                               | 4          | 6          | 10         | 7          |
| Duration of infertility, years    | 3.43                            | 2.87       | 3.24       | 3.16       | 2.95       |
| Previous fresh cycles, n          |                                 |            |            |            |            |
| IVF                               | 13                              | 18         | 14         | 19         | 18         |
| IVF-ICSI                          | 2                               | 1          | 3          | 2          | 1          |
| No. of ET prior to the current ET |                                 |            |            |            |            |
| 0                                 | 5                               | 5          | 2          | 4          | 4          |
| 1                                 | 5                               | 4          | 5          | 6          | 7          |
| 2                                 | 3                               | 4          | 6          | 5          | 3          |
| ≥3                                | 2                               | 6          | 4          | 6          | 5          |

Data are presented as the mean ± SD, n or mean. 1, 2 and 3 refer to the number of cycles of GnRHa, estradiol and progesterone treatment. GnRHa, gonadotropin-releasing hormone agonist; BMI, body mass index; IVF, *in vitro* fertilization; IVF-ICSI, *in vitro* fertilization and intracytoplasmic sperm injection, no., number; ET, embryo transplantation.

Table SII. Predicted consequential pairing between miR-223-3p and LIF 3'-UTR.

| Sequence name                                                                                                                                                                | Sequence details             |
|------------------------------------------------------------------------------------------------------------------------------------------------------------------------------|------------------------------|
| LIF 3'-UTR                                                                                                                                                                   | 3'-acCCCAUAAACUGUUUGACUGu-5' |
| miR-223-3p                                                                                                                                                                   | 5'-gtGGGGATGTTTCATACTGACa-3' |
| Lowercase letters indicate unpaired bases. Italicized capital letters indicate paired bases. 3'-UTR, 3'-untranslated region; miR, microRNA; LIF, leukemia inhibitory factor. |                              |
